# Supplementary material for: Phenotypic Heterogeneity of Pseudomonas aeruginosa Populations in a Cystic Fibrosis Patient
Source: PubMed Central journal article supplement (PMC3616088; doi:10.1371/journal.pone.0060225), 2013-04-03
Supplement: pone.0060225.s001.pdf [file pone.0060225.s001.pdf]

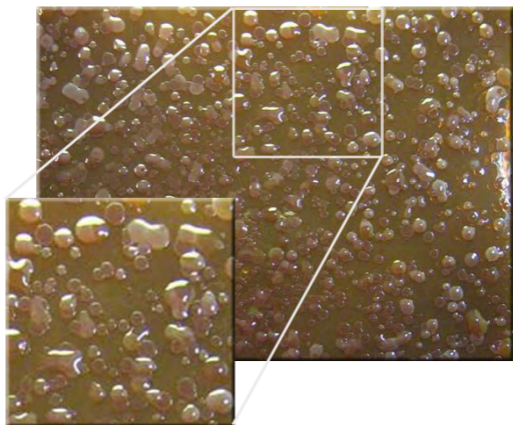

**Figure S1.** Representative plate showing the diversity of colony morphologies of *P. aeruginosa* isolates from a single sputum sample.
