# Supplementary material for: Phenotypic Heterogeneity of Pseudomonas aeruginosa Populations in a Cystic Fibrosis Patient
Source: PubMed Central journal article supplement (PMC3616088; doi:10.1371/journal.pone.0060225), 2013-04-03
Supplement: pone.0060225.s004.pdf [file pone.0060225.s004.pdf]

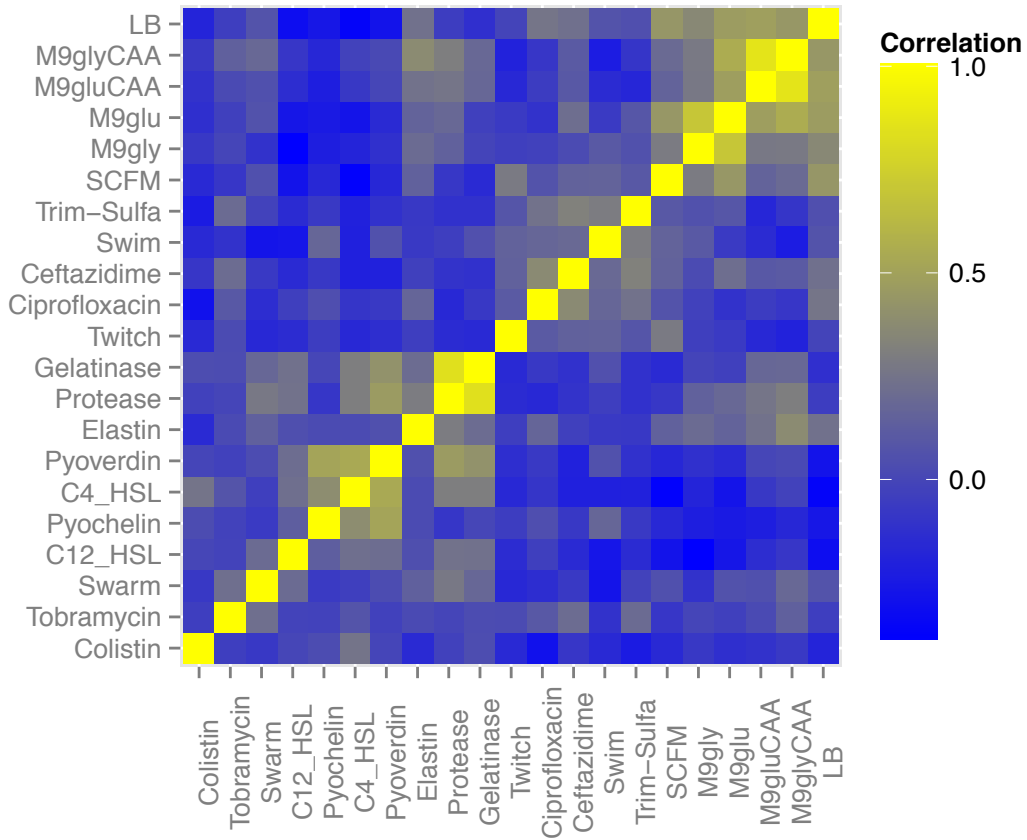

**Figure S4.** Correlation matrix of the measured phenotypes. The Pearson correlation coefficient was calculated for each phenotype pair where the yellow represents a high correlation (close to 1) and blue represents no correlation (close to 0).
