# Supplementary material for: Phenotypic Heterogeneity of Pseudomonas aeruginosa Populations in a Cystic Fibrosis Patient
Source: PubMed Central journal article supplement (PMC3616088; doi:10.1371/journal.pone.0060225), 2013-04-03
Supplement: pone.0060225.s005.pdf [file pone.0060225.s005.pdf]

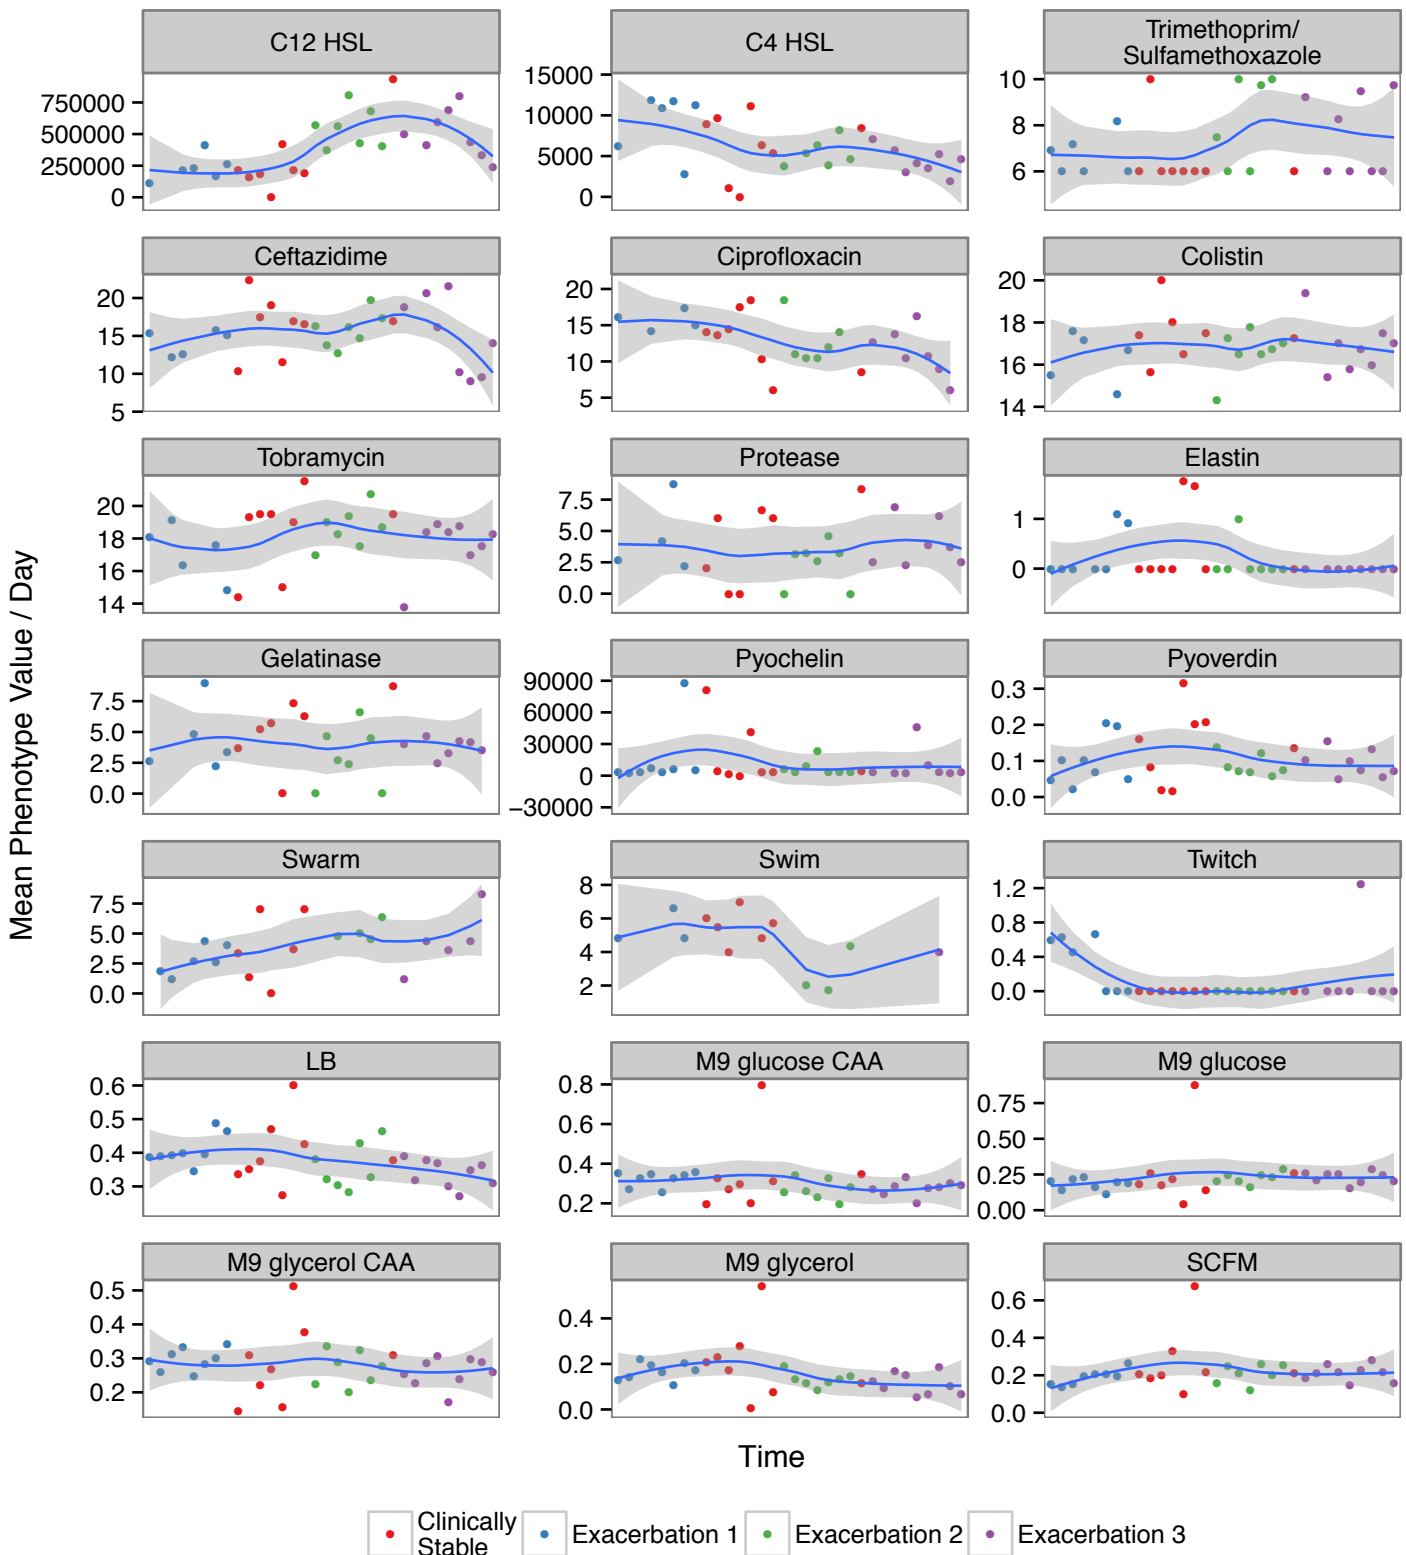

**Figure S5.** Changes in mean phenotype values over time. The mean of each phenotype was calculated for each sputum sample. The point are coloured according to the clinical status. A local smoothing function, shown with a blue line (shaded area represents 95% confidence intervals) was added to identify any trends present in the data.
