# Supplementary material for: Phenotypic Heterogeneity of Pseudomonas aeruginosa Populations in a Cystic Fibrosis Patient
Source: PubMed Central journal article supplement (PMC3616088; doi:10.1371/journal.pone.0060225), 2013-04-03
Supplement: pone.0060225.s010.pdf [file pone.0060225.s010.pdf]

**Table S1. Sample details**

| Event             | Date                 | Number of isolates | Antibiotic treatment during period                                                          |
|-------------------|----------------------|--------------------|---------------------------------------------------------------------------------------------|
| EXA1 <sup>a</sup> | Nov 8-20, 2007       | 64                 | Parenteral tobramycin and ceftazidime                                                       |
| CS1 <sup>b</sup>  | Feb 4, 2008          | 3                  | Inhaled tobramycin alternating with oral ciprofloxacin each sequentially for 2 weeks on/off |
| CS2               | April 16, 2008       | 2                  | Inhaled tobramycin alternating with oral ciprofloxacin each sequentially for 2 weeks on/off |
| CS3               | May 1, 2008          | 5                  | Inhaled tobramycin alternating with oral ciprofloxacin each sequentially for 2 weeks on/off |
| CS4               | May 8, 2008          | 5                  | Inhaled tobramycin alternating with oral ciprofloxacin each sequentially for 2 weeks on/off |
| CS5               | May 12, 2008         | 5                  | Inhaled tobramycin alternating with oral ciprofloxacin each sequentially for 2 weeks on/off |
| CS6               | June 16, 2000        | 6                  | Inhaled tobramycin alternating with oral ciprofloxacin each sequentially for 2 weeks on/off |
| EXA2              | July 17-30, 2000     | 30                 | Parenteral tobramycin and meropenem                                                         |
| CS7               | Aug 12, 2008         | 4                  | Inhaled tobramycin alternating with inhaled colistin each sequentially for 2 weeks on/off   |
| EXA3              | Sept 17- Oct 4, 2008 | 45                 | Parenteral tobramycin, tigecycline, meropenem, and ceftazidime                              |

<sup>a</sup>EXA, exacerbation period (hospitalization required)

<sup>b</sup>CS, clinically stable period (routine clinic visit)
